# Supplementary material for: Uncovering the Effects of the Cultivation Condition on Different Forms of Peptaibol’s Emericellipsins Production from an Alkaliphilic Fungus, Emericellopsis alkalina
Source: MDPI journal article supplement (doi:10.3390/fermentation9050422), 2023-04-27
Supplement: s1 [file s1]

## Supplementary Materials

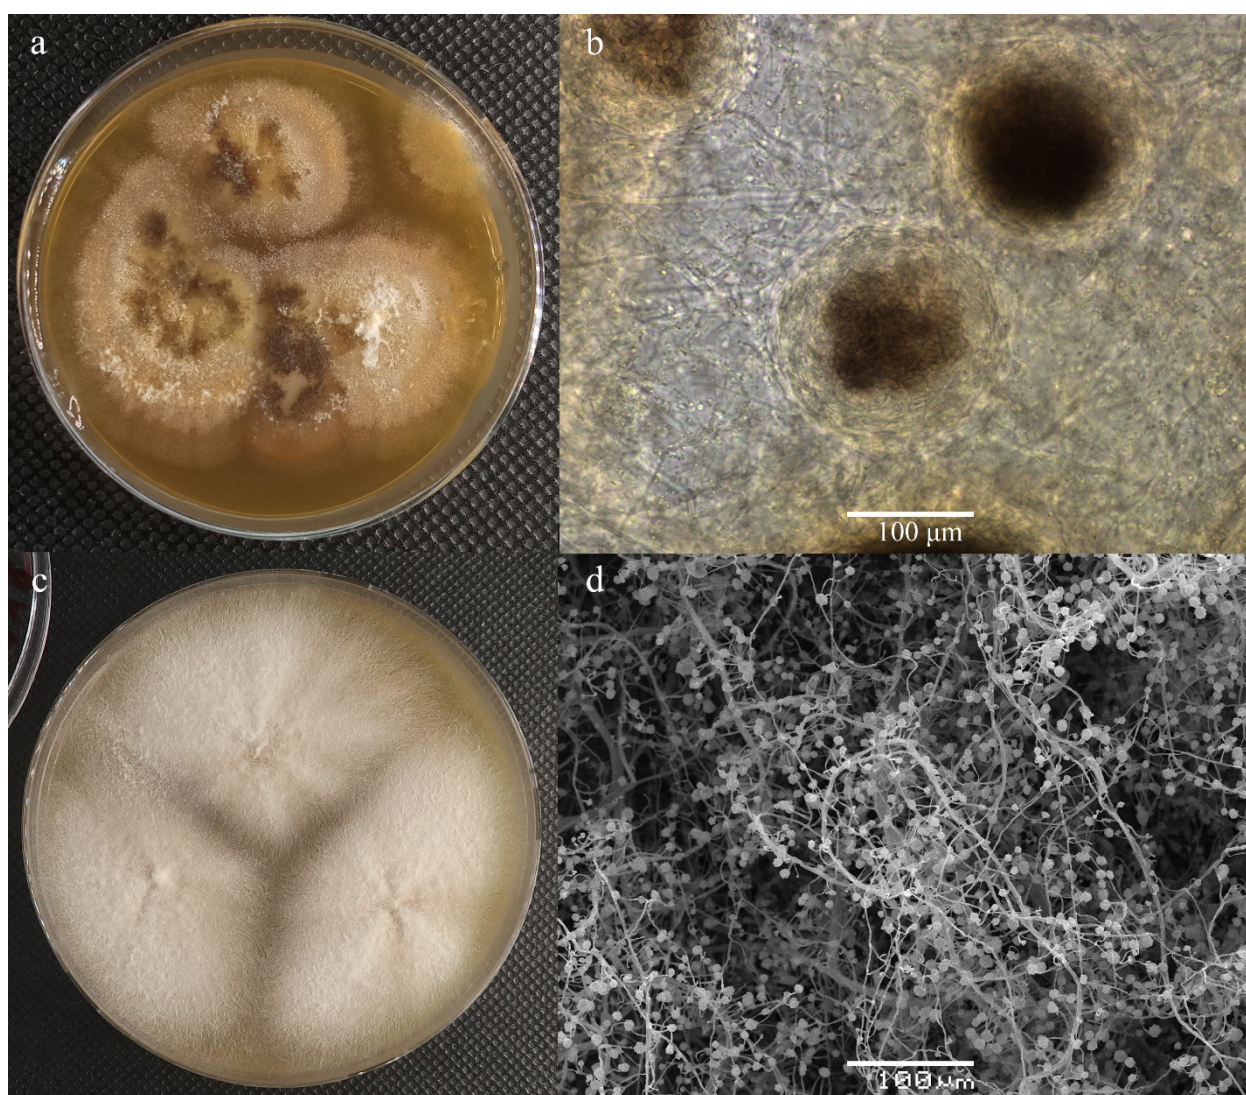

**Figure S1.** *Emericellopsis alkalina* E101 isolate: a-b) 14 d old colony on malt agar, form both conidial sporulation and the perfect stage (fruiting bodies); b) fruiting bodies with ascospores (LM); c-d) 14 d old colony on alkaline agar, only conidial sporulation is formed; d) numerous conidial heads (SEM)

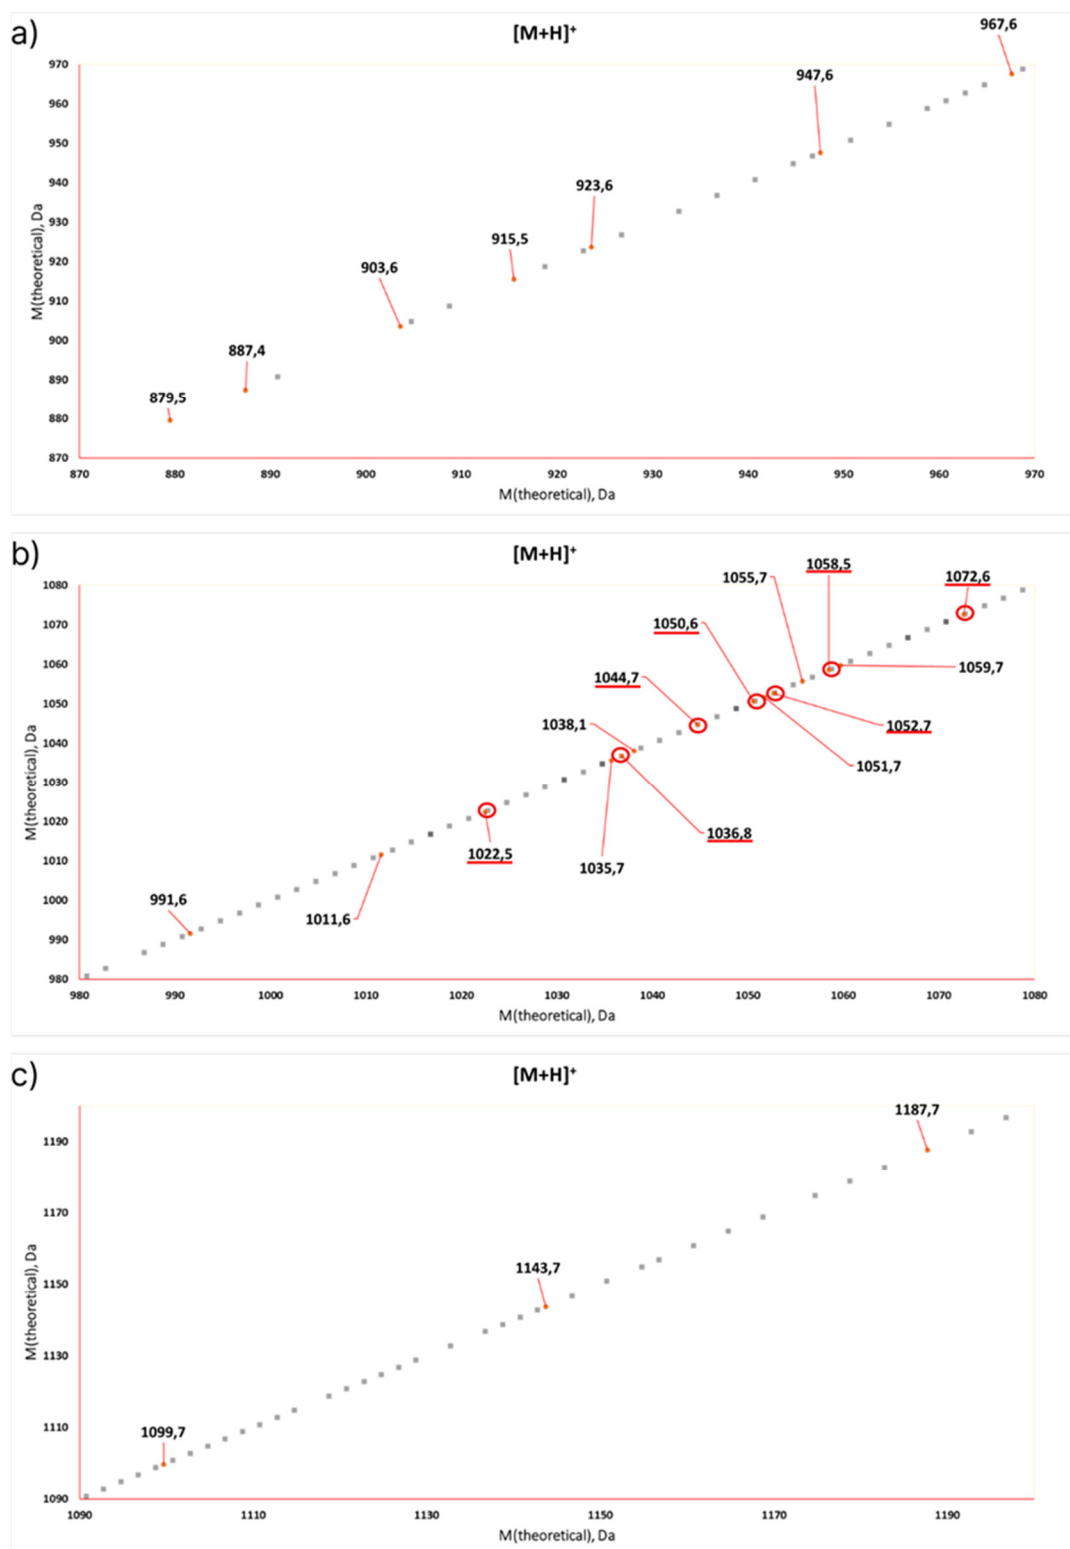

**Figure S2.** Dot scattering plot for homologues selection with form  $[EmiA+H]^+$ . a) Zoom [870 -970] Da b) Zoom [970 - 1080] Da. All the matches are indicated with red circles, all the masses of interest pointed with red line out. c) Zoom [1090 -1200] Da. All theoretical dots are colored in gray and all experimental dots are colored in red.

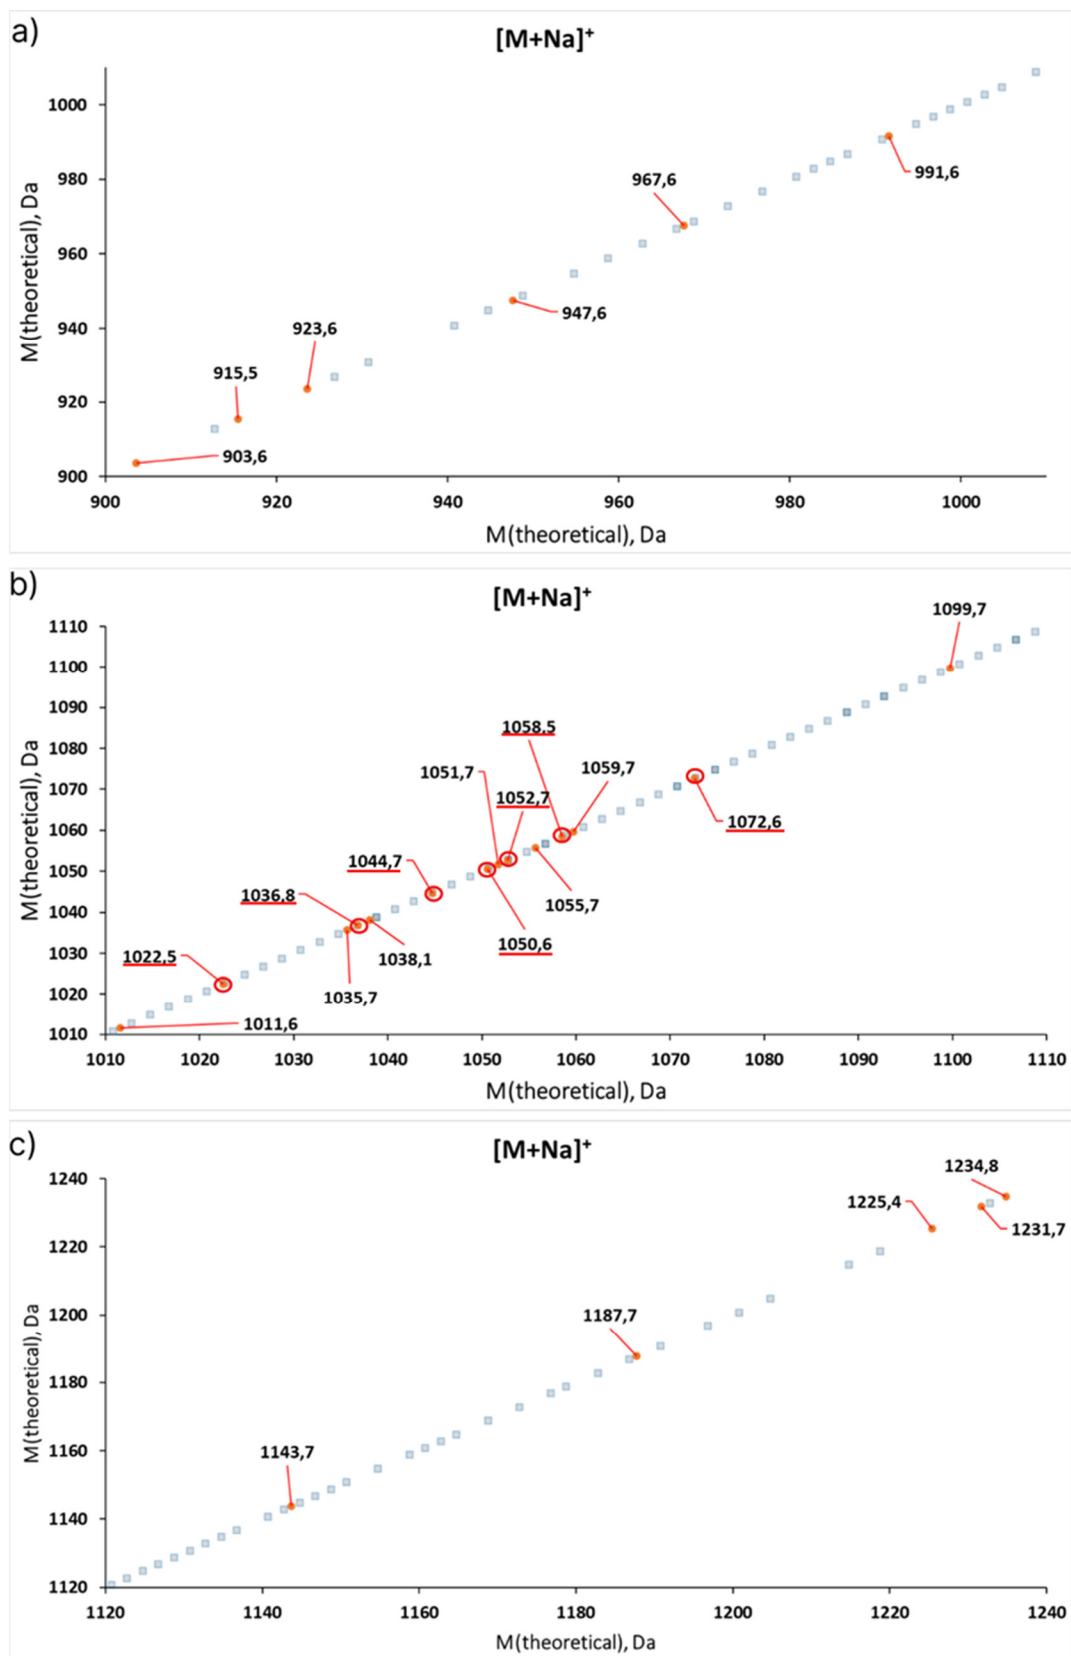

**Figure S3.** Dot scattering plot for homologues selection with form  $[\text{EmiA}+\text{Na}]^+$ . a) Zoom [900-1010] Da b) Zoom [1010 – 1110] Da. All the matches are indicated with red circles, all the masses of interest pointed with red line out. c) Zoom [1120 -1250] Da. All theoretical dots are colored in gray and all experimental dots are colored in red.

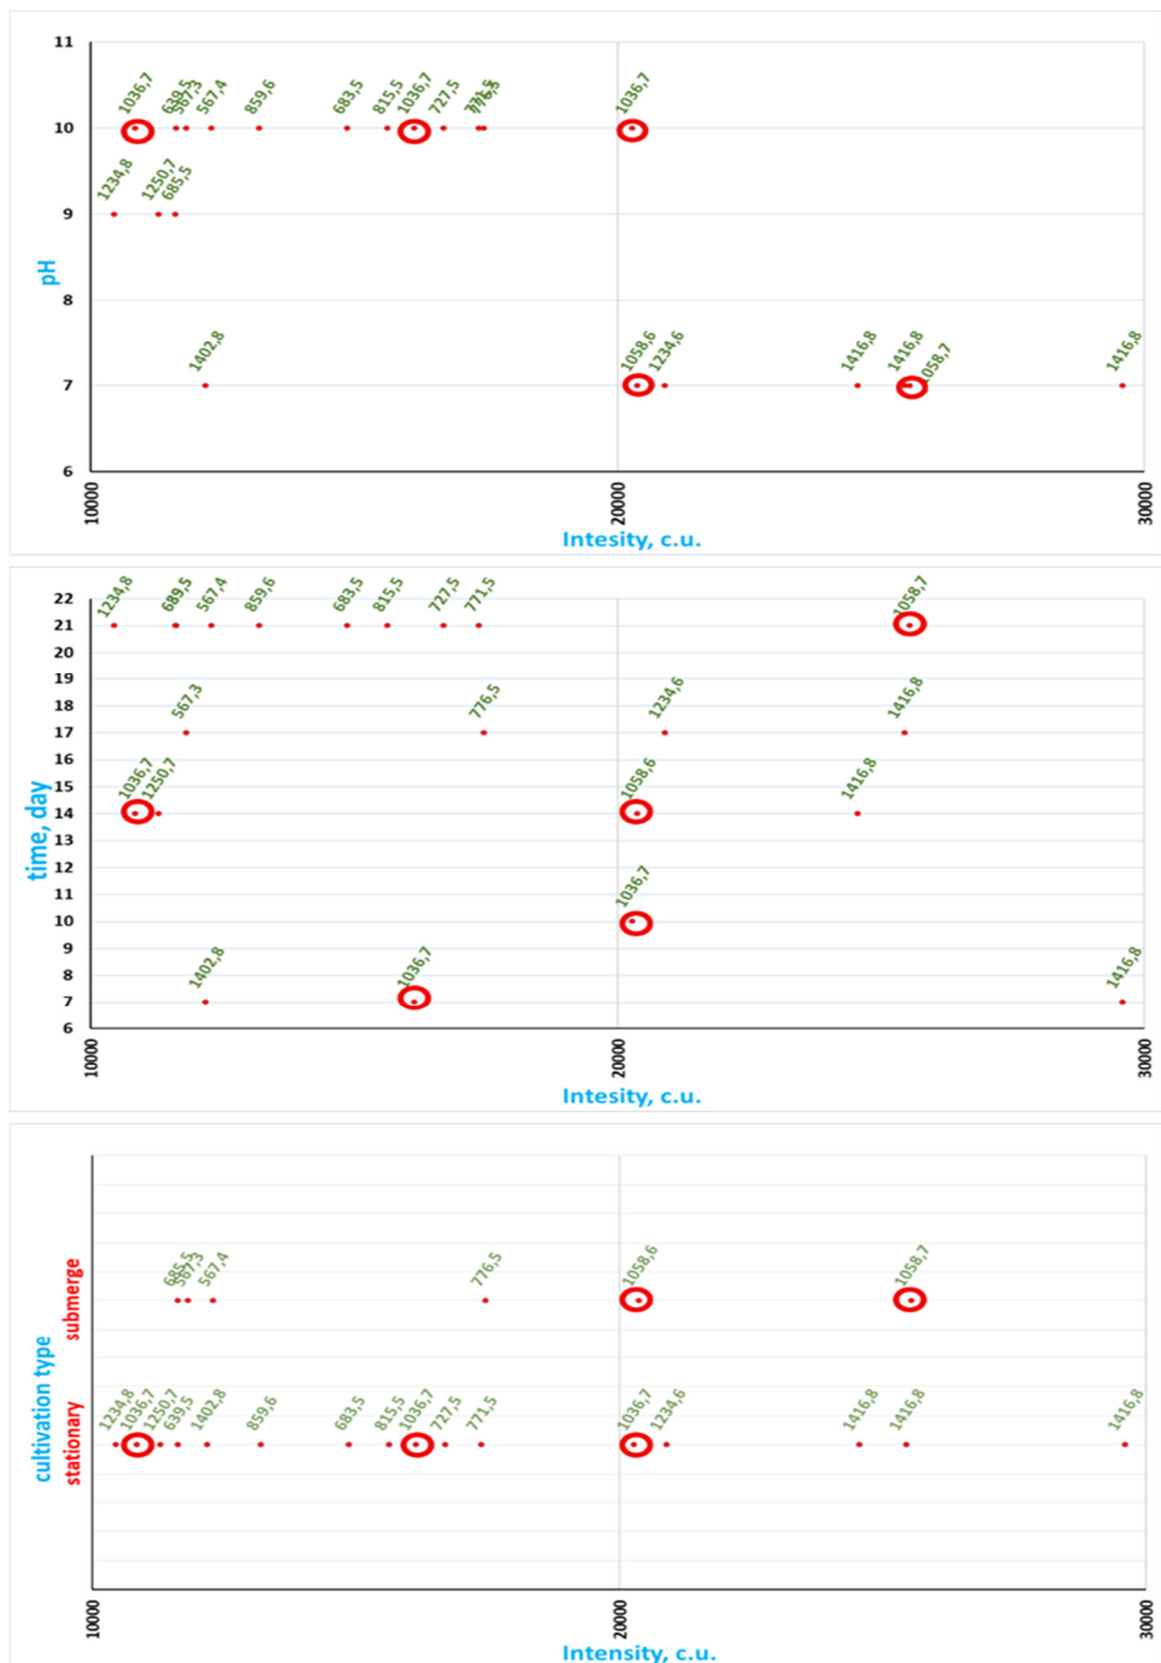

**Figure S4.** Samples selection with intensities higher than 10000 c.u. by attribute of a) pH b) day c) cultivation type. All the dots reflecting EmiA homologous that lies in the interval of interest are pointed with red circle out.
