# Supplementary material for: Uncovering the Effects of the Cultivation Condition on Different Forms of Peptaibol’s Emericellipsins Production from an Alkaliphilic Fungus, Emericellopsis alkalina
Source: MDPI journal article supplement (doi:10.3390/fermentation9050422), 2023-04-27
Supplement: s1 [file s1]

Archive with 1 entries (1 files):
- fermentation-2356012-supplementary.pdf
